# Supplementary material for: Priority Water Rights for Irrigation at the River Basin Level. Do They Improve Economic Efficiency During Drought Periods?
Source: Springer Nature journal article supplement (doi:10.1007/s11269-022-03228-8), 2022-07-13
Supplement: MOESM1 [file 23266494]

# Appendix

**Table A.1a**. Current climate scenario: Water allocation implementing proportional and priority water rights per farm type.

| ID | ft | Water availability | | | | | | | | | |
| --- | --- | --- | --- | --- | --- | --- | --- | --- | --- | --- | --- |
| 100% | 90% | 80% | 70% | 60% | 50% | 40% | 30% | 20% | 10% |
| Water allocation implementing proportional water rights (m3/ha) | | | | | | | | | |
| ID1 | f1.1 | 6100 | 5490 | 4880 | 4270 | 3660 | 3050 | 2440 | 1830 | 1220 | 610 |
| ID1 | f1.2 | 6100 | 5490 | 4880 | 4270 | 3660 | 3050 | 2440 | 1830 | 1220 | 610 |
| ID1 | f1.3 | 6100 | 5490 | 4880 | 4270 | 3660 | 3050 | 2440 | 1830 | 1220 | 610 |
| ID2 | f2.1 | 6000 | 5400 | 4800 | 4200 | 3600 | 3000 | 2400 | 1800 | 1200 | 600 |
| ID2 | f2.2 | 6000 | 5400 | 4800 | 4200 | 3600 | 3000 | 2400 | 1800 | 1200 | 600 |
| ID2 | f2.3 | 6000 | 5400 | 4800 | 4200 | 3600 | 3000 | 2400 | 1800 | 1200 | 600 |
| ID3 | f3.1 | 2800 | 2520 | 2240 | 1960 | 1680 | 1400 | 1120 | 840 | 560 | 280 |
| ID3 | f3.2 | 2800 | 2520 | 2240 | 1960 | 1680 | 1400 | 1120 | 840 | 560 | 280 |
| ID3 | f3.3 | 2800 | 2520 | 2240 | 1960 | 1680 | 1400 | 1120 | 840 | 560 | 280 |
| ID4 | f4.1 | 6000 | 5400 | 4800 | 4200 | 3600 | 3000 | 2400 | 1800 | 1200 | 600 |
| ID4 | f4.2 | 6000 | 5400 | 4800 | 4200 | 3600 | 3000 | 2400 | 1800 | 1200 | 600 |
| ID4 | f4.3 | 6000 | 5400 | 4800 | 4200 | 3600 | 3000 | 2400 | 1800 | 1200 | 600 |
| ID5 | f5.1 | 1500 | 1350 | 1200 | 1050 | 900 | 750 | 600 | 450 | 300 | 150 |
| ID6 | f6.1 | 1500 | 1350 | 1200 | 1050 | 900 | 750 | 600 | 450 | 300 | 150 |
| ID7 | f7.1 | 11,500 | 10,350 | 9200 | 8050 | 6900 | 5750 | 4600 | 3450 | 2300 | 1150 |
| Basin | | 3464 | 3118 | 2771 | 2425 | 2078 | 1732 | 1386 | 1039 | 693 | 346 |
|  |  | Water allocation implementing priority water rights (m3/ha) | | | | | | | | | |
| ID1 | f1.1 | 6100 | 5293 | 4486 | 3679 | 2872 | 2065 | 1457 | 1093 | 729 | 364 |
| ID1 | f1.2 | 6100 | 5282 | 4463 | 3645 | 2826 | 2008 | 1400 | 1050 | 700 | 350 |
| ID1 | f1.3 | 6100 | 5782 | 5463 | 5145 | 4827 | 4508 | 3895 | 2921 | 1947 | 974 |
| ID2 | f2.1 | 6000 | 5734 | 5468 | 5203 | 4937 | 4671 | 4067 | 3050 | 2034 | 1017 |
| ID2 | f2.2 | 6000 | 5522 | 5043 | 4565 | 4087 | 3608 | 3007 | 2255 | 1504 | 752 |
| ID2 | f2.3 | 6000 | 5611 | 5222 | 4833 | 4443 | 4054 | 3452 | 2589 | 1726 | 863 |
| ID3 | f3.1 | 2800 | 2420 | 2041 | 1661 | 1281 | 901 | 623 | 467 | 311 | 156 |
| ID3 | f3.2 | 2800 | 2450 | 2099 | 1749 | 1398 | 1048 | 769 | 576 | 384 | 192 |
| ID3 | f3.3 | 2800 | 2295 | 1791 | 1286 | 782 | 277 | 0 | 0 | 0 | 0 |
| ID4 | f4.1 | 6000 | 5297 | 4594 | 3890 | 3187 | 2484 | 1885 | 1414 | 943 | 471 |
| ID4 | f4.2 | 6000 | 5574 | 5148 | 4721 | 4295 | 3869 | 3267 | 2450 | 1633 | 817 |
| ID4 | f4.3 | 6000 | 6000 | 6000 | 6000 | 6000 | 6000 | 5393 | 4045 | 2697 | 1348 |
| ID5 | f5.1 | 1500 | 1386 | 1271 | 1157 | 1043 | 929 | 778 | 584 | 389 | 195 |
| ID6 | f6.1 | 1500 | 1375 | 1250 | 1125 | 1000 | 875 | 725 | 544 | 363 | 181 |
| ID7 | f7.1 | 11,500 | 9428 | 7356 | 5284 | 3212 | 1140 | 0 | 0 | 0 | 0 |
| Basin | | 3464 | 3118 | 2771 | 2425 | 2078 | 1732 | 1386 | 1039 | 693 | 346 |
|  |  | Changes in water allocation (Priority-Proportional) (%) | | | | | | | | | |
| ID1 | f1.1 | 0.0% | -3.6% | -8.1% | -13.8% | -21.5% | -32.3% | -40.3% | -40.3% | -40.3% | -40.3% |
| ID1 | f1.2 | 0.0% | -3.8% | -8.5% | -14.6% | -22.8% | -34.2% | -42.6% | -42.6% | -42.6% | -42.6% |
| ID1 | f1.3 | 0.0% | 5.3% | 12.0% | 20.5% | 31.9% | 47.8% | 59.6% | 59.6% | 59.6% | 59.6% |
| ID2 | f2.1 | 0.0% | 6.2% | 13.9% | 23.9% | 37.1% | 55.7% | 69.5% | 69.5% | 69.5% | 69.5% |
| ID2 | f2.2 | 0.0% | 2.3% | 5.1% | 8.7% | 13.5% | 20.3% | 25.3% | 25.3% | 25.3% | 25.3% |
| ID2 | f2.3 | 0.0% | 3.9% | 8.8% | 15.1% | 23.4% | 35.1% | 43.8% | 43.8% | 43.8% | 43.8% |
| ID3 | f3.1 | 0.0% | -4.0% | -8.9% | -15.3% | -23.7% | -35.6% | -44.4% | -44.4% | -44.4% | -44.4% |
| ID3 | f3.2 | 0.0% | -2.8% | -6.3% | -10.8% | -16.8% | -25.2% | -31.4% | -31.4% | -31.4% | -31.4% |
| ID3 | f3.3 | 0.0% | -8.9% | -20.0% | -34.4% | -53.5% | -80.2% | -100.0% | -100.0% | -100.0% | -100.0% |
| ID4 | f4.1 | 0.0% | -1.9% | -4.3% | -7.4% | -11.5% | -17.2% | -21.4% | -21.4% | -21.4% | -21.4% |
| ID4 | f4.2 | 0.0% | 3.2% | 7.2% | 12.4% | 19.3% | 29.0% | 36.1% | 36.1% | 36.1% | 36.1% |
| ID4 | f4.3 | 0.0% | 11.1% | 25.0% | 42.9% | 66.7% | 100.0% | 124.7% | 124.7% | 124.7% | 124.7% |
| ID5 | f5.1 | 0.0% | 2.6% | 6.0% | 10.2% | 15.9% | 23.8% | 29.7% | 29.7% | 29.7% | 29.7% |
| ID6 | f6.1 | 0.0% | 1.9% | 4.2% | 7.2% | 11.1% | 16.7% | 20.8% | 20.8% | 20.8% | 20.8% |
| ID7 | f7.1 | 0.0% | -8.9% | -20.0% | -34.4% | -53.5% | -80.2% | -100.0% | -100.0% | -100.0% | -100.0% |
| Basin | | 0,0% | 0.0% | 0.0% | 0.0% | 0.0% | 0.0% | 0.0% | 0.0% | 0.0% | 0.0% |

**Table A.1b**. Current climate scenario: Gross margin implementing proportional and priority water rights per farm type.

| ID | ft | Water availability | | | | | | | | | | |
| --- | --- | --- | --- | --- | --- | --- | --- | --- | --- | --- | --- | --- |
| 100% | 90% | 80% | 70% | 60% | 50% | 40% | 30% | 20% | 10% |
| Gross margin implementing proportional water rights (€/ha) | | | | | | | | | |
| ID1 | f1.1 | 1351 | 1351 | 1351 | 1351 | 1331 | 1258 | 1142 | 981 | 775 | 526 |
| ID1 | f1.2 | 1372 | 1372 | 1372 | 1368 | 1311 | 1229 | 1111 | 958 | 769 | 543 |
| ID1 | f1.3 | 1656 | 1585 | 1481 | 1359 | 1218 | 1072 | 926 | 778 | 614 | 431 |
| ID2 | f2.1 | 2891 | 2887 | 2767 | 2628 | 2462 | 2266 | 2039 | 1782 | 1447 | 900 |
| ID2 | f2.2 | 2135 | 2135 | 2135 | 2106 | 1993 | 1789 | 1543 | 1296 | 1035 | 728 |
| ID2 | f2.3 | 1779 | 1779 | 1708 | 1575 | 1430 | 1264 | 1076 | 867 | 636 | 385 |
| ID3 | f3.1 | 1287 | 1285 | 1274 | 1262 | 1233 | 1183 | 1125 | 1067 | 1000 | 908 |
| ID3 | f3.2 | 1274 | 1266 | 1255 | 1233 | 1194 | 1140 | 1082 | 1021 | 943 | 846 |
| ID3 | f3.3 | 1003 | 1003 | 1003 | 994 | 936 | 879 | 821 | 763 | 705 | 647 |
| ID4 | f4.1 | 2127 | 2127 | 2127 | 2127 | 2123 | 2056 | 1941 | 1754 | 1481 | 1053 |
| ID4 | f4.2 | 2577 | 2577 | 2577 | 2577 | 2577 | 2209 | 1767 | 1325 | 884 | 442 |
| ID4 | f4.3 | 1865 | 1705 | 1546 | 1386 | 1227 | 1067 | 908 | 748 | 588 | 429 |
| ID5 | f5.1 | 1112 | 1112 | 1112 | 1112 | 1074 | 1015 | 957 | 899 | 841 | 783 |
| ID6 | f6.1 | 474 | 474 | 474 | 474 | 439 | 387 | 336 | 284 | 232 | 180 |
| ID7 | f7.1 | 1471 | 1333 | 1196 | 1058 | 921 | 783 | 646 | 508 | 371 | 233 |
| Basin | | 1397 | 1390 | 1368 | 1340 | 1279 | 1186 | 1081 | 968 | 839 | 674 |
|  |  | Gross margin implementing priority water rights (€/ha) | | | | | | | | | |
| ID1 | f1.1 | 1351 | 1351 | 1351 | 1333 | 1229 | 1048 | 861 | 727 | 578 | 412 |
| ID1 | f1.2 | 1372 | 1372 | 1372 | 1309 | 1190 | 1006 | 828 | 709 | 578 | 436 |
| ID1 | f1.3 | 1656 | 1627 | 1581 | 1529 | 1471 | 1409 | 1274 | 1041 | 808 | 543 |
| ID2 | f2.1 | 2891 | 2891 | 2891 | 2856 | 2797 | 2738 | 2594 | 2283 | 1886 | 1303 |
| ID2 | f2.2 | 2135 | 2135 | 2135 | 2131 | 2091 | 1995 | 1792 | 1483 | 1171 | 815 |
| ID2 | f2.3 | 1779 | 1779 | 1777 | 1715 | 1629 | 1542 | 1391 | 1137 | 840 | 498 |
| ID3 | f3.1 | 1287 | 1281 | 1266 | 1231 | 1159 | 1080 | 1017 | 973 | 920 | 777 |
| ID3 | f3.2 | 1274 | 1263 | 1246 | 1205 | 1140 | 1067 | 1002 | 948 | 886 | 788 |
| ID3 | f3.3 | 1003 | 1003 | 959 | 855 | 751 | 647 | 589 | 589 | 589 | 589 |
| ID4 | f4.1 | 2127 | 2127 | 2127 | 2127 | 2082 | 1961 | 1786 | 1589 | 1318 | 954 |
| ID4 | f4.2 | 2577 | 2577 | 2577 | 2577 | 2577 | 2577 | 2405 | 1804 | 1203 | 601 |
| ID4 | f4.3 | 1865 | 1865 | 1865 | 1865 | 1865 | 1865 | 1704 | 1345 | 986 | 628 |
| ID5 | f5.1 | 1112 | 1112 | 1112 | 1112 | 1112 | 1085 | 1026 | 951 | 876 | 800 |
| ID6 | f6.1 | 474 | 474 | 474 | 474 | 474 | 431 | 379 | 316 | 254 | 191 |
| ID7 | f7.1 | 1471 | 1223 | 975 | 728 | 480 | 232 | 96 | 96 | 96 | 96 |
| Basin | | 1397 | 1386 | 1372 | 1347 | 1308 | 1241 | 1147 | 1022 | 882 | 705 |
|  |  | Changes in gross margin (Priority-Proportional) (%) | | | | | | | | | |
| ID1 | f1.1 | 0.0% | 0.0% | 0.0% | -1.4% | -7.7% | -16.7% | -24.6% | -25.9% | -25.5% | -21.6% |
| ID1 | f1.2 | 0.0% | 0.0% | 0.0% | -4.3% | -9.2% | -18.1% | -25.5% | -26.0% | -24.7% | -19.8% |
| ID1 | f1.3 | 0.0% | 2.7% | 6.7% | 12.5% | 20.8% | 31.4% | 37.6% | 33.8% | 31.5% | 25.9% |
| ID2 | f2.1 | 0.0% | 0.1% | 4.5% | 8.7% | 13.6% | 20.8% | 27.2% | 28.1% | 30.4% | 44.8% |
| ID2 | f2.2 | 0.0% | 0.0% | 0.0% | 1.2% | 4.9% | 11.5% | 16.2% | 14.4% | 13.2% | 12.0% |
| ID2 | f2.3 | 0.0% | 0.0% | 4.1% | 8.9% | 13.9% | 22.0% | 29.3% | 31.2% | 31.9% | 29.4% |
| ID3 | f3.1 | 0.0% | -0.3% | -0.6% | -2.5% | -6.1% | -8.7% | -9.6% | -8.9% | -8.0% | -14.4% |
| ID3 | f3.2 | 0.0% | -0.2% | -0.7% | -2.2% | -4.6% | -6.4% | -7.4% | -7.1% | -6.1% | -6.8% |
| ID3 | f3.3 | 0.0% | 0.0% | -4.3% | -14.0% | -19.8% | -26.4% | -28.2% | -22.8% | -16.4% | -8.9% |
| ID4 | f4.1 | 0.0% | 0.0% | 0.0% | 0.0% | -1.9% | -4.7% | -8.0% | -9.4% | -11.0% | -9.4% |
| ID4 | f4.2 | 0.0% | 0.0% | 0.0% | 0.0% | 0.0% | 16.7% | 36.1% | 36.1% | 36.1% | 36.1% |
| ID4 | f4.3 | 0.0% | 9.4% | 20.6% | 34.5% | 52.0% | 74.8% | 87.7% | 79.8% | 67.6% | 46.4% |
| ID5 | f5.1 | 0.0% | 0.0% | 0.0% | 0.0% | 3.6% | 6.8% | 7.2% | 5.8% | 4.1% | 2.2% |
| ID6 | f6.1 | 0.0% | 0.0% | 0.0% | 0.0% | 7.9% | 11.2% | 12.9% | 11.4% | 9.3% | 6.0% |
| ID7 | f7.1 | 0.0% | -8.3% | -18.4% | -31.3% | -47.9% | -70.4% | -85.2% | -81.2% | -74.2% | -59.0% |
| Basin | | 0.0% | 0.0% | 0.3% | 0.5% | 2.2% | 4.7% | 6.1% | 5.5% | 5.1% | 4.5% |

**Table A.2a**. Climate change scenario: Water allocation implementing proportional and priority water rights per farm type.

| ID | ft | Water availability | | | | | | | | | |
| --- | --- | --- | --- | --- | --- | --- | --- | --- | --- | --- | --- |
| 100% | 90% | 80% | 70% | 60% | 50% | 40% | 30% | 20% | 10% |
| Water allocation implementing proportional water rights (m3/ha) | | | | | | | | | |
| ID1 | f1.1 | 6100 | 5490 | 4880 | 4270 | 3660 | 3050 | 2440 | 1830 | 1220 | 610 |
| ID1 | f1.2 | 6100 | 5490 | 4880 | 4270 | 3660 | 3050 | 2440 | 1830 | 1220 | 610 |
| ID1 | f1.3 | 6100 | 5490 | 4880 | 4270 | 3660 | 3050 | 2440 | 1830 | 1220 | 610 |
| ID2 | f2.1 | 6000 | 5400 | 4800 | 4200 | 3600 | 3000 | 2400 | 1800 | 1200 | 600 |
| ID2 | f2.2 | 6000 | 5400 | 4800 | 4200 | 3600 | 3000 | 2400 | 1800 | 1200 | 600 |
| ID2 | f2.3 | 6000 | 5400 | 4800 | 4200 | 3600 | 3000 | 2400 | 1800 | 1200 | 600 |
| ID3 | f3.1 | 2800 | 2520 | 2240 | 1960 | 1680 | 1400 | 1120 | 840 | 560 | 280 |
| ID3 | f3.2 | 2800 | 2520 | 2240 | 1960 | 1680 | 1400 | 1120 | 840 | 560 | 280 |
| ID3 | f3.3 | 2800 | 2520 | 2240 | 1960 | 1680 | 1400 | 1120 | 840 | 560 | 280 |
| ID4 | f4.1 | 6000 | 5400 | 4800 | 4200 | 3600 | 3000 | 2400 | 1800 | 1200 | 600 |
| ID4 | f4.2 | 6000 | 5400 | 4800 | 4200 | 3600 | 3000 | 2400 | 1800 | 1200 | 600 |
| ID4 | f4.3 | 6000 | 5400 | 4800 | 4200 | 3600 | 3000 | 2400 | 1800 | 1200 | 600 |
| ID5 | f5.1 | 1500 | 1350 | 1200 | 1050 | 900 | 750 | 600 | 450 | 300 | 150 |
| ID6 | f6.1 | 1500 | 1350 | 1200 | 1050 | 900 | 750 | 600 | 450 | 300 | 150 |
| ID7 | f7.1 | 11,500 | 10,350 | 9200 | 8050 | 6900 | 5750 | 4600 | 3450 | 2300 | 1150 |
| Basin | | 3464 | 3118 | 2771 | 2425 | 2078 | 1732 | 1386 | 1039 | 693 | 346 |
|  |  | Water allocation implementing priority water rights (m3/ha) | | | | | | | | | |
| ID1 | f1.1 | 6100 | 5332 | 4564 | 3795 | 3027 | 2259 | 1697 | 1273 | 849 | 424 |
| ID1 | f1.2 | 6100 | 5288 | 4476 | 3665 | 2853 | 2041 | 1492 | 1119 | 746 | 373 |
| ID1 | f1.3 | 6100 | 5314 | 4528 | 3742 | 2956 | 2170 | 1614 | 1210 | 807 | 403 |
| ID2 | f2.1 | 6000 | 5698 | 5396 | 5094 | 4792 | 4490 | 3799 | 2849 | 1900 | 950 |
| ID2 | f2.2 | 6000 | 5568 | 5136 | 4705 | 4273 | 3841 | 3190 | 2392 | 1595 | 797 |
| ID2 | f2.3 | 6000 | 5538 | 5076 | 4614 | 4152 | 3690 | 3048 | 2286 | 1524 | 762 |
| ID3 | f3.1 | 2800 | 2408 | 2017 | 1625 | 1233 | 841 | 595 | 447 | 298 | 149 |
| ID3 | f3.2 | 2800 | 2423 | 2046 | 1669 | 1292 | 914 | 664 | 498 | 332 | 166 |
| ID3 | f3.3 | 2800 | 2281 | 1763 | 1244 | 726 | 207 | 0 | 0 | 0 | 0 |
| ID4 | f4.1 | 6000 | 5344 | 4688 | 4032 | 3376 | 2720 | 2137 | 1603 | 1069 | 534 |
| ID4 | f4.2 | 6000 | 5638 | 5275 | 4913 | 4551 | 4189 | 3516 | 2637 | 1758 | 879 |
| ID4 | f4.3 | 6000 | 6000 | 6000 | 6000 | 6000 | 6000 | 5217 | 3913 | 2609 | 1304 |
| ID5 | f5.1 | 1500 | 1393 | 1285 | 1178 | 1071 | 963 | 800 | 600 | 400 | 200 |
| ID6 | f6.1 | 1500 | 1390 | 1281 | 1171 | 1061 | 952 | 789 | 592 | 395 | 197 |
| ID7 | f7.1 | 11,500 | 9370 | 7241 | 5111 | 2981 | 852 | 0 | 0 | 0 | 0 |
| Basin | | 3464 | 3118 | 2771 | 2425 | 2078 | 1732 | 1386 | 1039 | 693 | 346 |
|  |  | Changes in water allocation (Priority-Proportional) (%) | | | | | | | | | |
| ID1 | f1.1 | 0.0% | -2.9% | -6.5% | -11.1% | -17.3% | -25.9% | -30.4% | -30.4% | -30.4% | -30.4% |
| ID1 | f1.2 | 0.0% | -3.7% | -8.3% | -14.2% | -22.1% | -33.1% | -38.8% | -38.8% | -38.8% | -38.8% |
| ID1 | f1.3 | 0.0% | -3.2% | -7.2% | -12.4% | -19.2% | -28.9% | -33.9% | -33.9% | -33.9% | -33.9% |
| ID2 | f2.1 | 0.0% | 5.5% | 12.4% | 21.3% | 33.1% | 49.7% | 58.3% | 58.3% | 58.3% | 58.3% |
| ID2 | f2.2 | 0.0% | 3.1% | 7.0% | 12.0% | 18.7% | 28.0% | 32.9% | 32.9% | 32.9% | 32.9% |
| ID2 | f2.3 | 0.0% | 2.6% | 5.7% | 9.9% | 15.3% | 23.0% | 27.0% | 27.0% | 27.0% | 27.0% |
| ID3 | f3.1 | 0.0% | -4.4% | -10.0% | -17.1% | -26.6% | -39.9% | -46.8% | -46.8% | -46.8% | -46.8% |
| ID3 | f3.2 | 0.0% | -3.9% | -8.7% | -14.9% | -23.1% | -34.7% | -40.7% | -40.7% | -40.7% | -40.7% |
| ID3 | f3.3 | 0.0% | -9.5% | -21.3% | -36.5% | -56.8% | -85.2% | -100.0% | -100.0% | -100.0% | -100.0% |
| ID4 | f4.1 | 0.0% | -1.0% | -2.3% | -4.0% | -6.2% | -9.3% | -10.9% | -10.9% | -10.9% | -10.9% |
| ID4 | f4.2 | 0.0% | 4.4% | 9.9% | 17.0% | 26.4% | 39.6% | 46.5% | 46.5% | 46.5% | 46.5% |
| ID4 | f4.3 | 0.0% | 11.1% | 25.0% | 42.9% | 66.7% | 100.0% | 117.4% | 117.4% | 117.4% | 117.4% |
| ID5 | f5.1 | 0.0% | 3.2% | 7.1% | 12.2% | 19.0% | 28.4% | 33.4% | 33.4% | 33.4% | 33.4% |
| ID6 | f6.1 | 0.0% | 3.0% | 6.7% | 11.5% | 17.9% | 26.9% | 31.6% | 31.6% | 31.6% | 31.6% |
| ID7 | f7.1 | 0.0% | -9.5% | -21.3% | -36.5% | -56.8% | -85.2% | -100.0% | -100.0% | -100.0% | -100.0% |
| Basin | | 0.0% | 0.0% | 0.0% | 0.0% | 0.0% | 0.0% | 0.0% | 0.0% | 0.0% | 0.0% |

**Table A.2b**. Climate change scenario: Gross margin implementing proportional and priority water rights per farm type.

| ID | ft | Water availability | | | | | | | | | |
| --- | --- | --- | --- | --- | --- | --- | --- | --- | --- | --- | --- |
| 100% | 90% | 80% | 70% | 60% | 50% | 40% | 30% | 20% | 10% |
| Gross margin implementing proportional water rights (€/ha) | | | | | | | | | |
| ID1 | f1.1 | 1351 | 1351 | 1351 | 1351 | 1331 | 1258 | 1142 | 981 | 775 | 526 |
| ID1 | f1.2 | 1372 | 1372 | 1372 | 1368 | 1311 | 1229 | 1111 | 958 | 769 | 543 |
| ID1 | f1.3 | 1656 | 1585 | 1481 | 1359 | 1218 | 1072 | 926 | 778 | 614 | 431 |
| ID2 | f2.1 | 2891 | 2887 | 2767 | 2628 | 2462 | 2266 | 2039 | 1782 | 1447 | 900 |
| ID2 | f2.2 | 2135 | 2135 | 2135 | 2106 | 1993 | 1789 | 1543 | 1296 | 1035 | 728 |
| ID2 | f2.3 | 1779 | 1779 | 1708 | 1575 | 1430 | 1264 | 1076 | 867 | 636 | 385 |
| ID3 | f3.1 | 1287 | 1285 | 1274 | 1262 | 1233 | 1183 | 1125 | 1067 | 1000 | 908 |
| ID3 | f3.2 | 1274 | 1266 | 1255 | 1233 | 1194 | 1140 | 1082 | 1021 | 943 | 846 |
| ID3 | f3.3 | 1003 | 1003 | 1003 | 994 | 936 | 879 | 821 | 763 | 705 | 647 |
| ID4 | f4.1 | 2127 | 2127 | 2127 | 2127 | 2123 | 2056 | 1941 | 1754 | 1481 | 1053 |
| ID4 | f4.2 | 2577 | 2577 | 2577 | 2577 | 2577 | 2209 | 1767 | 1325 | 884 | 442 |
| ID4 | f4.3 | 1865 | 1705 | 1546 | 1386 | 1227 | 1067 | 908 | 748 | 588 | 429 |
| ID5 | f5.1 | 1112 | 1112 | 1112 | 1112 | 1074 | 1015 | 957 | 899 | 841 | 783 |
| ID6 | f6.1 | 474 | 474 | 474 | 474 | 439 | 387 | 336 | 284 | 232 | 180 |
| ID7 | f7.1 | 1471 | 1333 | 1196 | 1058 | 921 | 783 | 646 | 508 | 371 | 233 |
| Basin | | 1397 | 1390 | 1368 | 1340 | 1279 | 1186 | 1081 | 968 | 839 | 674 |
|  |  | Gross margin implementing priority water rights (€/ha) | | | | | | | | | |
| ID1 | f1.1 | 1351 | 1351 | 1351 | 1344 | 1254 | 1099 | 940 | 795 | 629 | 441 |
| ID1 | f1.2 | 1372 | 1372 | 1372 | 1311 | 1195 | 1015 | 858 | 734 | 596 | 445 |
| ID1 | f1.3 | 1656 | 1557 | 1413 | 1238 | 1050 | 862 | 722 | 611 | 492 | 364 |
| ID2 | f2.1 | 2891 | 2891 | 2887 | 2832 | 2765 | 2698 | 2520 | 2212 | 1827 | 1246 |
| ID2 | f2.2 | 2135 | 2135 | 2135 | 2135 | 2113 | 2049 | 1864 | 1540 | 1211 | 838 |
| ID2 | f2.3 | 1779 | 1779 | 1764 | 1667 | 1564 | 1453 | 1278 | 1038 | 763 | 455 |
| ID3 | f3.1 | 1287 | 1281 | 1265 | 1225 | 1149 | 1068 | 1010 | 967 | 915 | 763 |
| ID3 | f3.2 | 1274 | 1262 | 1241 | 1192 | 1118 | 1038 | 974 | 924 | 866 | 750 |
| ID3 | f3.3 | 1003 | 1003 | 954 | 846 | 739 | 632 | 589 | 589 | 589 | 589 |
| ID4 | f4.1 | 2127 | 2127 | 2127 | 2127 | 2104 | 2009 | 1870 | 1674 | 1413 | 1002 |
| ID4 | f4.2 | 2577 | 2577 | 2577 | 2577 | 2577 | 2577 | 2577 | 1942 | 1294 | 647 |
| ID4 | f4.3 | 1865 | 1865 | 1865 | 1865 | 1865 | 1865 | 1657 | 1310 | 963 | 616 |
| ID5 | f5.1 | 1112 | 1112 | 1112 | 1112 | 1112 | 1098 | 1035 | 957 | 880 | 803 |
| ID6 | f6.1 | 474 | 474 | 474 | 474 | 474 | 457 | 401 | 333 | 265 | 196 |
| ID7 | f7.1 | 1471 | 1216 | 962 | 707 | 452 | 198 | 96 | 96 | 96 | 96 |
| Basin | | 1397 | 1385 | 1370 | 1341 | 1302 | 1245 | 1153 | 1025 | 884 | 701 |
|  |  | Changes in gross margin (Priority-Proportional) (%) | | | | | | | | | |
| ID1 | f1.1 | 0.0% | 0.0% | 0.0% | -0.5% | -5.8% | -12.7% | -17.7% | -18.9% | -18.9% | -16.2% |
| ID1 | f1.2 | 0.0% | 0.0% | 0.0% | -4.1% | -8.8% | -17.4% | -22.8% | -23.4% | -22.4% | -18.0% |
| ID1 | f1.3 | 0.0% | -1.8% | -4.6% | -8.9% | -13.8% | -19.6% | -22.0% | -21.5% | -19.9% | -15.4% |
| ID2 | f2.1 | 0.0% | 0.1% | 4.3% | 7.7% | 12.3% | 19.1% | 23.6% | 24.1% | 26.3% | 38.4% |
| ID2 | f2.2 | 0.0% | 0.0% | 0.0% | 1.4% | 6.0% | 14.5% | 20.8% | 18.8% | 17.0% | 15.2% |
| ID2 | f2.3 | 0.0% | 0.0% | 3.3% | 5.8% | 9.4% | 15.0% | 18.8% | 19.7% | 20.0% | 18.2% |
| ID3 | f3.1 | 0.0% | -0.3% | -0.7% | -2.9% | -6.9% | -9.8% | -10.3% | -9.5% | -8.5% | -15.9% |
| ID3 | f3.2 | 0.0% | -0.3% | -1.1% | -3.3% | -6.4% | -8.9% | -10.0% | -9.5% | -8.2% | -11.3% |
| ID3 | f3.3 | 0.0% | 0.0% | -4.9% | -14.9% | -21.1% | -28.1% | -28.2% | -22.8% | -16.4% | -8.9% |
| ID4 | f4.1 | 0.0% | 0.0% | 0.0% | 0.0% | -0.9% | -2.3% | -3.7% | -4.6% | -4.6% | -4.8% |
| ID4 | f4.2 | 0.0% | 0.0% | 0.0% | 0.0% | 0.0% | 16.7% | 45.8% | 46.5% | 46.5% | 46.5% |
| ID4 | f4.3 | 0.0% | 9.4% | 20.6% | 34.5% | 52.0% | 74.8% | 82.6% | 75.1% | 63.7% | 43.7% |
| ID5 | f5.1 | 0.0% | 0.0% | 0.0% | 0.0% | 3.6% | 8.1% | 8.1% | 6.5% | 4.6% | 2.5% |
| ID6 | f6.1 | 0.0% | 0.0% | 0.0% | 0.0% | 7.9% | 18.0% | 19.5% | 17.3% | 14.1% | 9.1% |
| ID7 | f7.1 | 0.0% | -8.8% | -19.6% | -33.2% | -50.9% | -74.8% | -85.2% | -81.2% | -74.2% | -59.0% |
| Basin | | 0.0% | 0.0% | 0.1% | 0.1% | 1.8% | 5.0% | 6.6% | 5.9% | 5.4% | 4.0% |
