# Supplementary material for: Priority Water Rights for Irrigation at the River Basin Level. Do They Improve Economic Efficiency During Drought Periods?
Source: Springer Nature journal article supplement (doi:10.1007/s11269-022-03228-8), 2022-07-13
Supplement: MOESM2 [file 23266494]

## Sheet: secundary sources
Data	Source	Institution	Web
Prices	Annual Yearbook	Ministry of Agriculture	https://www.mapa.gob.es/es/estadistica/temas/publicaciones/anuario-de-estadistica/
Yields	Annual Yearbook	Ministry of Agriculture	https://www.mapa.gob.es/es/estadistica/temas/publicaciones/anuario-de-estadistica/
Subsidies	Campaign data sorted by activity	FEGA (Fondo Español de Garantía Agraria)	https://www.fega.gob.es/es

## Sheet: crops and farm type data
Crop data (cropdata)
			Yield	vcost	watreq	Price	Subsidy	x_obs	gm
WHEAT	id1	f1	6685.71	607.517	4000	0.23923	0	1.93294	991.909
CORN	id1	f1	15153.2	1650.27	5850	0.230185	0	1.16875	1837.76
RICE	id1	f1
SUGARBEET	id1	f1	77476	1208.89	7000	0.0279471	1166.55	8.60383	2122.89
COTTON	id1	f1	3535.74	1578.01	4218.12	0.5264	1314.35	10.5885	1597.56
SUNFLOWER	id1	f1
ALFALFA	id1	f1	17342.9	389.964	8000	0.138516	0	0.179808	2012.3
TOMATO	id1	f1	118533	3953.81	6000	0.0739947	0	10.8582	4817.02
GARLIC	id1	f1
ONION	id1	f1	48435.9	3497.21	4000	0.191776	0	0.584377	5791.63
CARROT	id1	f1	45078	3398.34	4500	0.17192	0	1.88799	4351.47
POTATO	id1	f1
ORANGE_TREE	id1	f1
OLIVE_TREE	id1	f1
WHEAT_R	id1	f1	2735.71	547.932	0	0.23923	0		106.534
SUNFLOWER_R	id1	f1	1101.62	448.391	0	0.445235	0		42.0892
OLIVE_TREE_R	id1	f1
WHEAT	id1	f2	6685.71	607.517	4000	0.23923	0	1.5255	991.909
CORN	id1	f2	16941.4	1718.05	5000	0.230185	0	2.21646	2181.62
RICE	id1	f2
SUGARBEET	id1	f2	77476	1208.89	7000	0.0279471	1166.55	1.48063	2122.89
COTTON	id1	f2	3535.74	1578.01	4218.12	0.5264	1314.35	13.6756	1597.56
SUNFLOWER	id1	f2	3457.14	611.408	2000	0.445235	0	0.493544	927.834
ALFALFA	id1	f2	17342.9	389.964	8000	0.138516	0	0.897352	2012.3
TOMATO	id1	f2	118533	3953.81	6000	0.0739947	0	3.051	4817.02
GARLIC	id1	f2
ONION	id1	f2	48435.9	3497.21	4000	0.191776	0	0.134603	5791.63
CARROT	id1	f2	45078	3398.34	4500	0.17192	0	0.47111	4351.47
POTATO	id1	f2
ORANGE_TREE	id1	f2
OLIVE_TREE	id1	f2
WHEAT_R	id1	f2	2735.71	547.932	0	0.23923	0		106.534
SUNFLOWER_R	id1	f2	1101.62	448.391	0	0.445235	0		42.0892
OLIVE_TREE_R	id1	f2
WHEAT	id1	f3	6685.71	607.517	4000	0.23923	0	0.589888	991.909
CORN	id1	f3
RICE	id1	f3
SUGARBEET	id1	f3	77476	1208.89	7000	0.0279471	1166.55	5.85674	2122.89
COTTON	id1	f3	3535.74	1578.01	4218.12	0.5264	1314.35	8.55337	1597.56
SUNFLOWER	id1	f3
ALFALFA	id1	f3
TOMATO	id1	f3
GARLIC	id1	f3
ONION	id1	f3
CARROT	id1	f3
POTATO	id1	f3
ORANGE_TREE	id1	f3
OLIVE_TREE	id1	f3
WHEAT_R	id1	f3	2735.71	547.932	0	0.23923	0		106.534
SUNFLOWER_R	id1	f3	1101.62	448.391	0	0.445235	0		42.0892
OLIVE_TREE_R	id1	f3
WHEAT	id2	f1	4500	732.306	1500	0.2752	0	6.93031	506.094
CORN	id2	f1	13500	1529.53	8000	0.224	0	3.02052	1494.47
RICE	id2	f1
SUGARBEET	id2	f1
COTTON	id2	f1	2457.14	1627.1	3300	0.5072	1278.95	2.33011	898.113
SUNFLOWER	id2	f1	1800	365.524	1800	0.33	0	9.34672	228.476
ALFALFA	id2	f1
TOMATO	id2	f1
GARLIC	id2	f1	13314.3	5819.77	4000	1.096	0	2.49521	8772.69
ONION	id2	f1
CARROT	id2	f1
POTATO	id2	f1
ORANGE_TREE	id2	f1
OLIVE_TREE	id2	f1	8000	2376.68	2000	0.4224	0	10.872	1002.52
WHEAT_R	id2	f1	2900	642.034	0	0.2752	0		156.046
SUNFLOWER_R	id2	f1	1200	282.76	0	0.33	0		113.24
OLIVE_TREE_R	id2	f1	6000	1945.24	0	0.4224	0		589.159
WHEAT	id2	f2	4500	732.306	1500	0.2752	0	6.5613	506.094
CORN	id2	f2	13500	1529.53	8000	0.224	0	2.50873	1494.47
RICE	id2	f2
SUGARBEET	id2	f2
COTTON	id2	f2	2457.14	1627.1	3300	0.5072	1278.95	3.75024	898.113
SUNFLOWER	id2	f2	1800	365.524	1800	0.33	0	5.25548	228.476
ALFALFA	id2	f2
TOMATO	id2	f2
GARLIC	id2	f2	13314.3	5819.77	4000	1.096	0	1.73682	8772.69
ONION	id2	f2
CARROT	id2	f2
POTATO	id2	f2
ORANGE_TREE	id2	f2
OLIVE_TREE	id2	f2	8000	2376.68	2000	0.4224	0	6.06277	1002.52
WHEAT_R	id2	f2	2900	642.034	0	0.2752	0		156.046
SUNFLOWER_R	id2	f2	1200	282.76	0	0.33	0		113.24
OLIVE_TREE_R	id2	f2	6000	1945.24	0	0.4224	0		589.159
WHEAT	id2	f3
CORN	id2	f3
RICE	id2	f3
SUGARBEET	id2	f3
COTTON	id2	f3
SUNFLOWER	id2	f3
ALFALFA	id2	f3
TOMATO	id2	f3
GARLIC	id2	f3
ONION	id2	f3
CARROT	id2	f3
POTATO	id2	f3
ORANGE_TREE	id2	f3
OLIVE_TREE	id2	f3	8000	2376.68	2000	0.4224	0	6.63125	1002.52
WHEAT_R	id2	f3	2900	642.034	0	0.2752	0		156.046
SUNFLOWER_R	id2	f3	1200	282.76	0	0.33	0		113.24
OLIVE_TREE_R	id2	f3	6000	1945.24	0	0.4224	0		589.159
WHEAT	id3	f1	4250	721.59	1000	0.28	0	6.14	468.41
CORN	id3	f1	14029.3	1503.9	6000	0.24	0	25.85	1863.13
RICE	id3	f1
SUGARBEET	id3	f1
COTTON	id3	f1	2341.57	1526.59	3000	0.41	1278.95	4.98	712.404
SUNFLOWER	id3	f1	2100.71	435.6	1500	0.42	0	6.34	446.698
ALFALFA	id3	f1
TOMATO	id3	f1
GARLIC	id3	f1	13000	5193.32	4000	1.1	0	1.7	9106.68
ONION	id3	f1	52714.3	5667.72	4000	0.29		2.73	9619.42
CARROT	id3	f1
POTATO	id3	f1	29714.3	5716.6	3000	0.212053	0	2.69	584.409
ORANGE_TREE	id3	f1	34617.1	3181.72	3500	0.17		19.73	2703.19
OLIVE_TREE	id3	f1	9362.86	1985.03	2000	0.38448	0	9.49	1614.8
WHEAT_R	id3	f1	2600	627.85	0	0.28	0		100.15
SUNFLOWER_R	id3	f1	1496.43	364.028	0	0.423216	0		269.285
ORANGE_TREE_R	id3	f1	0	0	0	0	0		0
OLIVE_TREE_R	id3	f1	6357.14	1868.38	0	0.38448	0		575.819
WHEAT	id3	f2
CORN	id3	f2
RICE	id3	f2
SUGARBEET	id3	f2
COTTON	id3	f2
SUNFLOWER	id3	f2
ALFALFA	id3	f2
TOMATO	id3	f2
GARLIC	id3	f2
ONION	id3	f2
CARROT	id3	f2
POTATO	id3	f2
ORANGE_TREE	id3	f2	34617.1	3181.72	3500	0.166352		47.6409	2576.91
OLIVE_TREE	id3	f2	9362.86	1985.03	2000	0.38448			1614.8
WHEAT_R	id3	f2	2600	627.85	0	0.28			100.15
SUNFLOWER_R	id3	f2	1496.43	364.028	0	0.423216			269.285
ORANGE_TREE_R	id3	f2	0	0	0	0	0		0
OLIVE_TREE_R	id3	f2	6357.14	1868.38	0	0.38448			575.819
WHEAT	id3	f3
CORN	id3	f3	14029.3	1503.9	6000	0.240128	0	13.1	1864.92
RICE	id3	f3
SUGARBEET	id3	f3
COTTON	id3	f3
SUNFLOWER	id3	f3
ALFALFA	id3	f3
TOMATO	id3	f3
GARLIC	id3	f3
ONION	id3	f3
CARROT	id3	f3
POTATO	id3	f3
ORANGE_TREE	id3	f3
OLIVE_TREE	id3	f3	9362.86	1985.03	2000	0.38448	0		1614.8
WHEAT_R	id3	f3	2600	627.854	0	0.28	0		100.146
SUNFLOWER_R	id3	f3	1496.43	364.028	0	0.423216	0		269.285
OLIVE_TREE_R	id3	f3	6357.14	1868.38	0	0.38448	0		575.819
WHEAT	id4	f1
CORN	id4	f1
RICE	id4	f1
SUGARBEET	id4	f1
COTTON	id4	f1	3445.63	1663.19	4000	0.50848	1274.12	13.1865	1362.97
SUNFLOWER	id4	f1	2404	628.319	2000	0.439728	0	0.337597	428.787
ALFALFA	id4	f1
TOMATO	id4	f1	74036.8	2978.1	6000	0.07728	0	0.112532	2743.46
GARLIC	id4	f1
ONION	id4	f1
CARROT	id4	f1
POTATO	id4	f1
ORANGE_TREE	id4	f1
OLIVE_TREE	id4	f1
WHEAT_R	id4	f1	3335.71	595.779	0	0.247056	0		228.33
SUNFLOWER_R	id4	f1	1051.57	587.819	0	0.439728	0		-125.414
OLIVE_TREE_R	id4	f1
WHEAT	id4	f2	5668.14	657.129	3000	0.247056	0	0.351975	743.22
CORN	id4	f2	12351.2	1385.01	6000	0.2436	0	6.59953	1623.75
RICE	id4	f2
SUGARBEET	id4	f2	64951.6	1142.78	5500	0.04072	1014.27	2.61015	2516.32
COTTON	id4	f2	2996.2	1446.25	4000	0.50848	1107.93	21.8031	1185.19
SUNFLOWER	id4	f2	2404	628.319	2000	0.439728	0	2.59632	428.787
ALFALFA	id4	f2	17342.9	391.491	8000	0.138516	0	0.289122	2010.77
TOMATO	id4	f2	74036.8	2978.1	6000	0.07728	0	1.39533	2743.46
GARLIC	id4	f2
ONION	id4	f2
CARROT	id4	f2
POTATO	id4	f2
ORANGE_TREE	id4	f2
OLIVE_TREE	id4	f2
WHEAT_R	id4	f2	3335.71	595.779	0	0.247056	0		228.33
SUNFLOWER_R	id4	f2	1051.57	587.819	0	0.439728	0		-125.414
OLIVE_TREE_R	id4	f2
WHEAT	id4	f3
CORN	id4	f3
RICE	id4	f3
SUGARBEET	id4	f3
COTTON	id4	f3	2996.2	1446.25	4000	0.50848	1107.93	7.74419	1185.19
SUNFLOWER	id4	f3
ALFALFA	id4	f3	17342.9	391.491	7500	0.138516	0	10.2558	2010.77
TOMATO	id4	f3
GARLIC	id4	f3
ONION	id4	f3
CARROT	id4	f3
POTATO	id4	f3
ORANGE_TREE	id4	f3
OLIVE_TREE	id4	f3
WHEAT_R	id4	f3	3335.71	595.779	0	0.247056	0		228.33
SUNFLOWER_R	id4	f3	1051.57	587.819	0	0.439728	0		-125.414
OLIVE_TREE_R	id4	f3
WHEAT	id5	f1
CORN	id5	f1
RICE	id5	f1	8985.71	1408.15	11500	0.2928	248	39.3	1470.87
SUGARBEET	id5	f1
COTTON	id5	f1
SUNFLOWER	id5	f1
ALFALFA	id5	f1
TOMATO	id5	f1
GARLIC	id5	f1
ONION	id5	f1
CARROT	id5	f1
POTATO	id5	f1
ORANGE_TREE	id5	f1
OLIVE_TREE	id5	f1
WHEAT_R	id5	f1	2500	552.365		0.259243			95.7415
SUNFLOWER_R	id5	f1	1101.62	448.391		0.445235			42.0892
OLIVE_TREE_R	id5	f1
WHEAT	id6	f1
CORN	id6	f1
RICE	id6	f1
SUGARBEET	id6	f1
COTTON	id6	f1
SUNFLOWER	id6	f1
ALFALFA	id6	f1
TOMATO	id6	f1
GARLIC	id6	f1
ONION	id6	f1
CARROT	id6	f1
POTATO	id6	f1
ORANGE_TREE	id6	f1
OLIVE_TREE	id6	f1	5816.5	1862.64	1000	0.511467	0	17.4	1112.31
WHEAT_R	id6	f1
SUNFLOWER_R	id6	f1
OLIVE_TREE_R	id6	f1	4541.5	1597.81	0	0.511467	0		725.017
WHEAT	id7	f1
CORN	id7	f1
RICE	id7	f1
SUGARBEET	id7	f1
COTTON	id7	f1
SUNFLOWER	id7	f1
ALFALFA	id7	f1
TOMATO	id7	f1
GARLIC	id7	f1
ONION	id7	f1
CARROT	id7	f1
POTATO	id7	f1
ORANGE_TREE	id7	f1
OLIVE_TREE	id7	f1	4934	1894.53	1000	0.48	0	6.4	473.788
WHEAT_R	id7	f1
SUNFLOWER_R	id7	f1
OLIVE_TREE_R	id7	f1	4000.67	1792.03	0	0.48	0		128.288
Farm data (farmdata)			farm area (ha)	number of farms in ID	ID's multiplier to basin	farm's weight over basin area	farm's weight over id	Total area represented	farm's weight over basin water
			size	nf	m	w	wfid	tarea	wwater
	id1	f1	35.8043	213.563	10.6531	0.101293	0.521797	81458.5	0.175451
	id1	f2	23.9458	222.848	10.6531	0.07069	0.364149	56847.9	0.122443
	id1	f3	15	111.424	10.6531	0.0221406	0.114054	17805.1	0.03835
	id2	f1	34.9949	205.371	10.6531	0.0952055	0.653254	76562.8	0.0769564
	id2	f2	25.8753	117.355	10.6531	0.0402259	0.276011	32349.1	0.0325153
	id2	f3	6.63125	117.355	10.6531	0.010309	0.0707351	8290.31	0.00833293
	id3	f1	79.65	34.077	10.6531	0.0359555	0.677046	28914.9	0.0622789
	id3	f2	47.6409	24.9898	10.6531	0.0157711	0.296971	12682.9	0.0273172
	id3	f3	13.1	7.95129	10.6531	0.00137984	0.0259825	1109.64	0.00239003
	id4	f1	13.6367	122.434	3.28845	0.00682724	0.139365	5490.36	0.0120226
	id4	f2	35.6455	272.075	3.28845	0.0396578	0.809536	31892.2	0.0698366
	id4	f3	18	34.0094	3.28845	0.00250326	0.0510992	2013.09	0.0044082
	id5	f1	39.3	64.9873	13.7485	0.0436635	1	35113.5	0.144958
	id6	f1	17.4	36.0057	471.939	0.367664	1	295670	0.159209
	id7	f1	6.4	39.0625	471.939	0.146713	1	117985	0.063531
							804185
Irrigation district data (iddata)
			ID water allotment (m3/ha)	ID's size	ID weight over basin area	ID's multiplier to basin	ID water allotment (m3)	total area represented	ID weight over basin water alloc
			fwaid	total_size	wid	m	FWAID	tarea	wwaterid
		id1	6000	14654.1	0.194124	10.6531	9.36669e+08	156112	0.336244
		id2	2800	11001.7	0.14574	10.6531	3.28166e+08	117202	0.117805
		id3	6000	4008.93	0.0531064	10.6531	2.56244e+08	42707.4	0.0919862
		id4	6100	11980	0.0489883	3.28845	2.40314e+08	39395.7	0.0862675
		id5	11500	2554	0.0436635	13.7485	4.03806e+08	35113.5	0.144958
		id6	1500	626.5	0.367664	471.939	4.43505e+08	295670	0.159209
		id7	1500	250	0.146713	471.939	1.76977e+08	117985	0.063531
		basin		45075.3	1		2.78568e+09	804185
cluster (clusterdata)
			cluster's weight over basin	cluster's weight over basin water
			wcluster	wwcluster
	cluster1		0.0489883	0.0862675
	cluster2		0.392971	0.546035
	cluster3		0.514377	0.22274
	cluster4		0.0436635	0.144958

## Sheet: distribution current climate
s1	1
s2	0.763849
s3	1
s4	0.82317
s5	0.847996
s6	0.918085
s7	0.985932
s8	0.873964
s9	1
s10	0.428531
s11	0.813769
s12	0.898735
s13	1
s14	1
s15	0.437006
s16	0.961573
s17	0.501684
s18	0.95306
s19	0.996953
s20	1
s21	1
s22	1
s23	1
s24	1
s25	0.778197
s26	1
s27	0.895185
s28	1
s29	0.397052
s30	0.804419
s31	1
s32	0.855649
s33	0.621857
s34	0.524168
s35	0.997225
s36	1
s37	0.826803
s38	1
s39	0.0428872
s40	1
s41	0.982816
s42	0.975581
s43	0.935404
s44	1
s45	0.420285
s46	0.491012
s47	1
s48	1
s49	0.307244
s50	0.138156
s51	0.875727
s52	1
s53	0.61612
s54	0.841214
s55	1
s56	1
s57	1
s58	0.495532
s59	0.688268
s60	1
s61	0.962714
s62	1
s63	0.770099
s64	0.852125
s65	1
s66	1
s67	0.184835
s68	0.892022
s69	0.496499
s70	1
s71	0.572925
s72	0.597255
s73	0.841024
s74	1
s75	0.438147
s76	0.877843
s77	1
s78	0.351442
s79	1
s80	0.900841
s81	0.887515
s82	1
s83	0.685973
s84	0.441586
s85	1
s86	1
s87	1
s88	0.559428
s89	1
s90	1
s91	0.868506
s92	0.541408
s93	0.894213
s94	1
s95	0.810063
s96	0.969643
s97	0.678026
s98	0.827814
s99	1
s100	1
s101	0.783491
s102	1
s103	1
s104	0.833504
s105	1
s106	0.810061
s107	1
s108	1
s109	0.981651
s110	1
s111	0.36443
s112	0.308957
s113	1
s114	0.383746
s115	0.96288
s116	0.816087
s117	0.384429
s118	1
s119	0.853547
s120	0.334041
s121	1
s122	1
s123	0.481548
s124	1
s125	1
s126	0.991694
s127	0.944251
s128	1
s129	0.752213
s130	0.942616
s131	1
s132	0.205104
s133	0.771316
s134	1
s135	0.304247
s136	0.402288
s137	1
s138	0.76679
s139	0.7816
s140	0.630813
s141	0.823348
s142	0.273438
s143	0.949715
s144	1
s145	0.52118
s146	0.994504
s147	0.762574
s148	0.83389
s149	0.934762
s150	0.69188
s151	0.955675
s152	0.83502
s153	1
s154	0.591356
s155	0.93199
s156	0.99313
s157	0.829523
s158	1
s159	1
s160	0.967536
s161	1
s162	1
s163	0.386791
s164	0.106559
s165	0.508643
s166	0.36299
s167	0.95764
s168	0.958588
s169	0.816987
s170	0.666216
s171	0.688879
s172	0.531206
s173	0.40527
s174	0.764175
s175	0.8327
s176	1
s177	1
s178	0.971504
s179	0.772501
s180	0.376851
s181	0.11915
s182	1
s183	1
s184	0.580928
s185	0.940152
s186	1
s187	1
s188	1
s189	0.378588
s190	1
s191	0.839039
s192	1
s193	0.864569
s194	1
s195	0.36502
s196	0.896335
s197	0.452245
s198	0.850354
s199	1
s200	0.246144
s201	0.815526
s202	0.0822166
s203	1
s204	0.680686
s205	1
s206	0.625353
s207	0.908963
s208	1
s209	0.907751
s210	1
s211	1
s212	0.824001
s213	0.977839
s214	1
s215	0.429076
s216	0.442183
s217	0.971405
s218	0.476538
s219	0.76069
s220	0.757674
s221	0.608703
s222	0.897665
s223	0.917771
s224	1
s225	0.585145
s226	0.789315
s227	0.836362
s228	0.396682
s229	0.763607
s230	0.375882
s231	0.86759
s232	1
s233	0.869688
s234	0.460145
s235	0.572966
s236	0.834902
s237	0.484148
s238	1
s239	0.556332
s240	1
s241	0.626381
s242	1
s243	0.965024
s244	1
s245	1
s246	1
s247	1
s248	0.348454
s249	0.261359
s250	0.566237
s251	0.313703
s252	0.521624
s253	0.994922
s254	0.86712
s255	0.687041
s256	1
s257	0.68138
s258	1
s259	0.539254
s260	1
s261	0.385473
s262	0.856816
s263	0.825779
s264	1
s265	1
s266	0.633354
s267	0.604954
s268	1
s269	0.901363
s270	0.932049
s271	0.771111
s272	0.859646
s273	1
s274	0.241821
s275	1
s276	1
s277	0.586277
s278	0.866788
s279	0.84527
s280	0.484086
s281	1
s282	1
s283	0.553894
s284	0.633264
s285	0.896403
s286	0.9942
s287	0.971262
s288	1
s289	0.123565
s290	1
s291	1
s292	0.822885
s293	0.848723
s294	1
s295	1
s296	0.227994
s297	1
s298	0.859423
s299	0.464954
s300	0.483778
s301	1
s302	1
s303	0.822492
s304	1
s305	0.788247
s306	0.851738
s307	0.938605
s308	0.832011
s309	0.926244
s310	1
s311	0.779186
s312	0.914445
s313	0.461772
s314	0.0847592
s315	1
s316	1
s317	1
s318	0.794365
s319	0.949707
s320	0
s321	0.618087
s322	0.436603
s323	0.501259
s324	0.76212
s325	0.770105
s326	0.764584
s327	0.650166
s328	0.877547
s329	0.922604
s330	0.518243
s331	0.389938
s332	0.93257
s333	0.890466
s334	0.872582
s335	1
s336	0.931684
s337	0.85162
s338	0.656437
s339	0.818809
s340	0.907559
s341	0.794376
s342	1
s343	0.96996
s344	1
s345	1
s346	0.877596
s347	0.682962
s348	1
s349	0.789702
s350	1
s351	0.937223
s352	0.865214
s353	1
s354	0.455185
s355	1
s356	0.774906
s357	0.481932
s358	0.685126
s359	0.766227
s360	0.82559
s361	0.969597
s362	0.537517
s363	0.770309
s364	0.302653
s365	0.972085
s366	0.255998
s367	0.543237
s368	0.778152
s369	0.54637
s370	0.79957
s371	0.859599
s372	0.683865
s373	0.874336
s374	0.806777
s375	0.846901
s376	0.686734
s377	0.286361
s378	0.696045
s379	0.216443
s380	0.5944
s381	0.971799
s382	1
s383	0.34565
s384	0.895581
s385	1
s386	0.271815
s387	1
s388	0.525869
s389	0.690087
s390	0.788908
s391	0.695694
s392	1
s393	0.801926
s394	0.908217
s395	0.483681
s396	0.309604
s397	0.979917
s398	0.90064
s399	0.649598
s400	1
s401	0.330592
s402	1
s403	1
s404	0.42772
s405	1
s406	0.659029
s407	0.364062
s408	1
s409	1
s410	0.455679
s411	0.522789
s412	0.341046
s413	0.325879
s414	0.319669
s415	1
s416	0.811467
s417	0.778609
s418	0.629208
s419	0.777669
s420	0.555227
s421	1
s422	1
s423	1
s424	1
s425	1
s426	0.193273
s427	1
s428	1
s429	0.301604
s430	0.653349
s431	0.835078
s432	1
s433	1
s434	0.649592
s435	1
s436	1
s437	0.374575
s438	0.436622
s439	0.29246
s440	0.825242
s441	0.784601
s442	1
s443	0.669277
s444	0.754249
s445	0.510441
s446	1
s447	1
s448	1
s449	0.489788
s450	1
s451	1
s452	1
s453	0.937066
s454	1
s455	0.765686
s456	0.554941
s457	0.861672
s458	1
s459	1
s460	0.770879
s461	0.283632
s462	1
s463	1
s464	0.618407
s465	0.832986
s466	0.183278
s467	1
s468	0.26289
s469	0.414824
s470	0.613082
s471	0.938959
s472	0.56393
s473	1
s474	1
s475	0.766676
s476	0.808078
s477	0.427081
s478	0.807745
s479	0.421366
s480	1
s481	0.884252
s482	1
s483	1
s484	1
s485	1
s486	0.247054
s487	0.313215
s488	0.0494105
s489	0.831869
s490	0.88332
s491	0.506768
s492	1
s493	1
s494	0.278351
s495	0.800297
s496	0.661064
s497	0.872119
s498	0.352076
s499	0.506961
s500	0.474501
s501	1
s502	0.272903
s503	1
s504	1
s505	0.49189
s506	0.758389
s507	1
s508	0.337207
s509	0.881543
s510	0.885117
s511	0.559399
s512	0.38267
s513	1
s514	0.810793
s515	1
s516	1
s517	0.969488
s518	0.934886
s519	0.754098
s520	1
s521	0.940501
s522	0.506072
s523	1
s524	0.913777
s525	0.327088
s526	0.939789
s527	0.15357
s528	0.861202
s529	1
s530	0.964028
s531	1
s532	0.913943
s533	0.474536
s534	1
s535	0.409214
s536	0.941008
s537	0.599793
s538	0.810802
s539	0.283126
s540	0.796428
s541	0.306578
s542	1
s543	0.626748
s544	0.869373
s545	0.769263
s546	0.792647
s547	0.843719
s548	0.781199
s549	1
s550	0.98077
s551	0.268564
s552	0.249069
s553	0.654294
s554	0.797439
s555	0.75738
s556	0.772363
s557	0.900297
s558	0.566753
s559	0.788942
s560	1
s561	1
s562	1
s563	1
s564	0.908562
s565	0.795346
s566	0.66907
s567	0.860479
s568	0.854627
s569	1
s570	0.310556
s571	0.831342
s572	0.813889
s573	0.941927
s574	0.937168
s575	1
s576	1
s577	0.532862
s578	0.854746
s579	1
s580	1
s581	0.533953
s582	0.301241
s583	0.608257
s584	0.965879
s585	0.413509
s586	1
s587	1
s588	0.572098
s589	0.972127
s590	0.874866
s591	0.826359
s592	0.885678
s593	1
s594	0.883795
s595	0.843638
s596	0.854014
s597	0.987772
s598	0.273922
s599	1
s600	0.457403
s601	0.642739
s602	0.402595
s603	1
s604	0.941167
s605	0.980101
s606	0.865045
s607	0.235338
s608	1
s609	1
s610	1
s611	1
s612	0.998415
s613	0.791984
s614	1
s615	1
s616	0.826265
s617	0.48163
s618	0.859477
s619	1
s620	0.330309
s621	0.672556
s622	0.44776
s623	0.927758
s624	0.0119561
s625	0.95588
s626	0.959258
s627	0.48754
s628	0.985151
s629	0.508474
s630	1
s631	0.942979
s632	0.490349
s633	1
s634	0.363842
s635	1
s636	0.81342
s637	1
s638	0.985831
s639	0.923647
s640	0.807117
s641	1
s642	0.179007
s643	1
s644	1
s645	1
s646	1
s647	1
s648	0.470331
s649	0.945888
s650	1
s651	1
s652	0.32672
s653	0.972959
s654	1
s655	0.861826
s656	0.828627
s657	1
s658	0.325254
s659	0.544799
s660	0.754183
s661	0.965311
s662	0.803031
s663	0.792383
s664	0.879581
s665	1
s666	0.814386
s667	0.8213
s668	0.620192
s669	0.812004
s670	0.60227
s671	0.993993
s672	0.682993
s673	0.418794
s674	0.588735
s675	0.615982
s676	0.882863
s677	0.836954
s678	0.784353
s679	0.432544
s680	0.930134
s681	0.79181
s682	0.94686
s683	0.877549
s684	0.840619
s685	0.843661
s686	0.646861
s687	0.553682
s688	1
s689	0.755903
s690	1
s691	1
s692	0.58323
s693	0.992567
s694	0.899225
s695	1
s696	0.812675
s697	1
s698	0.753502
s699	0.385434
s700	0.777425
s701	0.79695
s702	1
s703	0.187986
s704	1
s705	1
s706	1
s707	0.790157
s708	1
s709	0.596748
s710	0.777097
s711	1
s712	0.955303
s713	0.390595
s714	1
s715	0.578103
s716	0.775502
s717	0.809691
s718	0.0794128
s719	0.891779
s720	0.851547
s721	0.924478
s722	0.576703
s723	0.164724
s724	0.622907
s725	0.773731
s726	1
s727	0.696993
s728	1
s729	0.812485
s730	1
s731	0.907585
s732	0.488665
s733	0.753448
s734	0.800506
s735	1
s736	0.89995
s737	0.986728
s738	0.759056
s739	0.983044
s740	0.801311
s741	1
s742	1
s743	1
s744	0.831345
s745	0.91216
s746	0.566429
s747	1
s748	1
s749	1
s750	1
s751	0.917698
s752	0.613413
s753	0.381695
s754	0.888616
s755	0.615735
s756	1
s757	0.802854
s758	0.942641
s759	1
s760	0.895886
s761	0.782771
s762	0.864548
s763	0.93116
s764	0.888093
s765	0.490438
s766	0.822117
s767	1
s768	0.369009
s769	1
s770	0.808261
s771	0.881375
s772	0.485488
s773	0.360891
s774	0.901468
s775	1
s776	0.910202
s777	0.788611
s778	0.571932
s779	1
s780	0.91287
s781	1
s782	1
s783	0.796619
s784	0.689295
s785	1
s786	0.811012
s787	0.256983
s788	0.904488
s789	0.82189
s790	0.455505
s791	0.671192
s792	0.698337
s793	0.912935
s794	0.851228
s795	1
s796	0.863982
s797	0.595929
s798	0.982095
s799	0.899777
s800	1
s801	1
s802	0.803347
s803	0.368029
s804	0.867814
s805	0.750465
s806	0.784088
s807	0.877361
s808	0.249683
s809	1
s810	0.598374
s811	1
s812	0.826076
s813	1
s814	0.651996
s815	0.774739
s816	1
s817	0.650951
s818	0.396881
s819	1
s820	0.840464
s821	0.507616
s822	0.38869
s823	1
s824	0.793754
s825	1
s826	0.31566
s827	0.562543
s828	0.983686
s829	0.446097
s830	1
s831	0.750329
s832	0.9358
s833	0.426015
s834	0.883392
s835	0.754626
s836	0.225621
s837	1
s838	0.83603
s839	0.793013
s840	0.481888
s841	0.928318
s842	0.909777
s843	0.564348
s844	0.33838
s845	1
s846	0.87116
s847	1
s848	0.641322
s849	1
s850	1
s851	0.503473
s852	0.616791
s853	0.82889
s854	1
s855	1
s856	0.366727
s857	0.836816
s858	1
s859	0.943792
s860	0.907174
s861	0.793423
s862	0.214237
s863	0.548112
s864	0.635254
s865	0.407173
s866	0.914076
s867	0.988361
s868	1
s869	0.500392
s870	1
s871	0.771878
s872	0.893207
s873	0.918709
s874	0.780455
s875	0.796786
s876	0.755812
s877	0.652893
s878	1
s879	0.787871
s880	0.933652
s881	0.796359
s882	0.405307
s883	1
s884	0.636032
s885	0.908505
s886	0.192676
s887	0.771772
s888	0.912282
s889	0.0941573
s890	0.441154
s891	0.774539
s892	1
s893	0.417881
s894	0.837894
s895	0.635384
s896	0.822838
s897	0.856477
s898	0.754585
s899	1
s900	0.851063
s901	0.985856
s902	0.657465
s903	0.821167
s904	0.151267
s905	0.901939
s906	0.978928
s907	0.532259
s908	0.288673
s909	0.339399
s910	0.875078
s911	1
s912	0.765514
s913	0.444922
s914	1
s915	0.917546
s916	0.942882
s917	0.976912
s918	0.874884
s919	0.31793
s920	1
s921	0.401843
s922	0.760906
s923	0.757813
s924	0.854325
s925	0.799762
s926	1
s927	0.579666
s928	0.982528
s929	0.752013
s930	0.879525
s931	0.908387
s932	0.964391
s933	0.990682
s934	0.672062
s935	0.999796
s936	0.820096
s937	1
s938	1
s939	0.920838
s940	1
s941	0.869795
s942	0.620914
s943	0.937029
s944	0.986238
s945	0.225312
s946	0.854632
s947	0.938851
s948	0.784981
s949	1
s950	0.306058
s951	1
s952	1
s953	1
s954	0.546214
s955	1
s956	0.750816
s957	0.98374
s958	0.856634
s959	1
s960	1
s961	0.542866
s962	0.598173
s963	0.881484
s964	0.611506
s965	1
s966	0.783127
s967	0.995635
s968	0.522209
s969	1
s970	0.772312
s971	0.246626
s972	0.812188
s973	1
s974	1
s975	0.769382
s976	0.847082
s977	0.950868
s978	1
s979	1
s980	0.751543
s981	0.555201
s982	0.532181
s983	1
s984	0.95997
s985	0.759811
s986	0.97589
s987	1
s988	0.322993
s989	1
s990	0.802372
s991	1
s992	1
s993	1
s994	1
s995	0.878292
s996	0.186203
s997	1
s998	1
s999	0.974519
s1000	0.777297

## Sheet: distribution climate change
s1	0.249118
s2	0.369637
s3	0.963783
s4	0.542485
s5	1
s6	1
s7	0.901922
s8	0.806873
s9	0.459414
s10	0.888719
s11	1
s12	1
s13	0.552614
s14	0.54828
s15	1
s16	0.800852
s17	1
s18	1
s19	0.99424
s20	0.546146
s21	0.841242
s22	0.362085
s23	0.232398
s24	0.558612
s25	0.283114
s26	0.145185
s27	0.371908
s28	0.869821
s29	0.183001
s30	0.299749
s31	1
s32	0.535033
s33	0.808785
s34	1
s35	1
s36	1
s37	0.321103
s38	1
s39	0.906187
s40	0.457787
s41	1
s42	0.329689
s43	0.98541
s44	0.254586
s45	1
s46	0.894995
s47	0.319179
s48	0.85167
s49	0.131591
s50	0.949282
s51	0.92065
s52	0.11775
s53	0.271056
s54	0.392225
s55	1
s56	0.52562
s57	0.142736
s58	1
s59	0.917756
s60	0.472384
s61	0.247934
s62	0.938446
s63	0.374852
s64	0.172303
s65	1
s66	1
s67	0.425248
s68	0.132562
s69	1
s70	0.886515
s71	0.461001
s72	0.317839
s73	0.553876
s74	0.805401
s75	0.440445
s76	0.923134
s77	1
s78	0.537772
s79	1
s80	0.922877
s81	1
s82	0.832376
s83	0.383144
s84	0.155766
s85	1
s86	1
s87	0.476245
s88	0.83948
s89	0.547197
s90	0.323422
s91	1
s92	1
s93	0.889756
s94	0.969566
s95	0.209812
s96	1
s97	0.33699
s98	0.350094
s99	1
s100	1
s101	0.365828
s102	0.275776
s103	1
s104	0.559176
s105	0.284247
s106	0.16875
s107	1
s108	0.371798
s109	1
s110	0.859984
s111	0.0577409
s112	0.543908
s113	0.825376
s114	0.4282
s115	0.918403
s116	0.265343
s117	0.832879
s118	0.52608
s119	0.841298
s120	0.840402
s121	0.377043
s122	0.864498
s123	1
s124	0.310703
s125	0.555058
s126	0.854175
s127	1
s128	1
s129	0.232752
s130	0.871621
s131	0.328697
s132	0.544343
s133	0.851804
s134	1
s135	1
s136	1
s137	0.428374
s138	0.910106
s139	0.465674
s140	0.84977
s141	0.301958
s142	1
s143	1
s144	0.805914
s145	0.394741
s146	0.955805
s147	0.155164
s148	0.880197
s149	0.977464
s150	0.322991
s151	0.912218
s152	0.867735
s153	1
s154	0.89525
s155	0.258329
s156	0.835404
s157	1
s158	0.995356
s159	0.971708
s160	1
s161	0.40585
s162	0.449195
s163	0.92113
s164	0.420108
s165	1
s166	0.232394
s167	0.964943
s168	0.0795049
s169	0.482848
s170	0.285224
s171	1
s172	0.927348
s173	0.314637
s174	0.185791
s175	0.815326
s176	0.534202
s177	1
s178	1
s179	0.999606
s180	1
s181	0.317461
s182	0.542016
s183	1
s184	0.348799
s185	0.382207
s186	1
s187	1
s188	0.411661
s189	1
s190	1
s191	0.814164
s192	0.936906
s193	0.921182
s194	0.3478
s195	0.95663
s196	1
s197	0.460124
s198	0.981355
s199	0.930869
s200	0.978892
s201	1
s202	0.482702
s203	0.541494
s204	0.809619
s205	0.0909877
s206	0.463793
s207	0.26467
s208	1
s209	0.899775
s210	0.545441
s211	0.544026
s212	1
s213	0.99063
s214	1
s215	0.550429
s216	0.828279
s217	0.240198
s218	0.536779
s219	0.852928
s220	0.822337
s221	1
s222	1
s223	0.940451
s224	0.879294
s225	0.418936
s226	0.291591
s227	0.977119
s228	0.159272
s229	0.320578
s230	0.225467
s231	0.269089
s232	0.402188
s233	0.80738
s234	0.433709
s235	0.851849
s236	1
s237	1
s238	0.838905
s239	0.938428
s240	0.450843
s241	1
s242	1
s243	0.460246
s244	1
s245	0.970236
s246	0.842501
s247	0.95572
s248	0.55613
s249	0.940025
s250	1
s251	0.849571
s252	1
s253	1
s254	0.983395
s255	1
s256	0.994122
s257	1
s258	0.436983
s259	0.844179
s260	0.950274
s261	0.803417
s262	0.533452
s263	1
s264	0.820246
s265	1
s266	0.897562
s267	0.24512
s268	0.228846
s269	0.0670017
s270	1
s271	0.810279
s272	1
s273	1
s274	1
s275	0.923247
s276	0.551089
s277	0.31447
s278	0.881929
s279	0.874708
s280	1
s281	0.24545
s282	1
s283	0.354109
s284	0.393837
s285	0.534694
s286	0.526962
s287	0.545271
s288	0.0630371
s289	0.538528
s290	0.52554
s291	0.549823
s292	0.339381
s293	0.21999
s294	1
s295	0.909043
s296	1
s297	0.253305
s298	0.915819
s299	0.40633
s300	1
s301	0.469847
s302	0.827604
s303	0.534231
s304	0.227468
s305	0.81242
s306	0.975267
s307	0.5513
s308	0.807632
s309	0.467054
s310	0.868139
s311	1
s312	1
s313	0.53963
s314	0.906842
s315	1
s316	0.527797
s317	0.891419
s318	0.199892
s319	0.539513
s320	0.101633
s321	1
s322	0.843606
s323	1
s324	0.532747
s325	0.967885
s326	1
s327	0.379919
s328	1
s329	0.270754
s330	1
s331	0.551408
s332	0.32185
s333	0.542432
s334	0.800594
s335	1
s336	1
s337	1
s338	0.829758
s339	0.968483
s340	0.898504
s341	0.99455
s342	0.981697
s343	0.93929
s344	0.336368
s345	0.556758
s346	0.16819
s347	0.401462
s348	1
s349	0.860736
s350	0.548365
s351	0.218021
s352	0.359816
s353	0.470501
s354	0.555767
s355	1
s356	0.942682
s357	1
s358	0.811383
s359	0.180382
s360	0.956506
s361	0.99497
s362	0.363273
s363	0.464863
s364	1
s365	0.552068
s366	1
s367	0.482702
s368	0.996487
s369	0.429074
s370	1
s371	0.546153
s372	1
s373	0.406225
s374	0.245064
s375	0.109107
s376	1
s377	0.948339
s378	1
s379	0.540152
s380	0.840011
s381	0.393735
s382	1
s383	1
s384	0.88793
s385	0.544643
s386	0.467998
s387	0.527254
s388	0.802573
s389	1
s390	1
s391	0.333672
s392	0.354757
s393	1
s394	0.55081
s395	1
s396	0.976378
s397	0.379765
s398	0.479371
s399	0.857593
s400	0.264637
s401	0.919265
s402	0.462125
s403	0.869784
s404	1
s405	1
s406	0.540767
s407	0.229258
s408	0.837194
s409	1
s410	1
s411	1
s412	0.54264
s413	0.163791
s414	1
s415	0.981654
s416	1
s417	0.804816
s418	0.422547
s419	0.476735
s420	0.451568
s421	0.980447
s422	0.899754
s423	0.939478
s424	0.0507532
s425	0.961664
s426	1
s427	0.439844
s428	0.368442
s429	0.842579
s430	0.848524
s431	1
s432	0.919691
s433	0.977006
s434	0.841391
s435	0.932099
s436	1
s437	0.813903
s438	0.872454
s439	1
s440	0.848821
s441	1
s442	0.990401
s443	0.418895
s444	0.312941
s445	0.840151
s446	0.468716
s447	0.328691
s448	0.84844
s449	0.87872
s450	1
s451	0.99779
s452	0.431353
s453	1
s454	0.387502
s455	1
s456	0.183011
s457	0.903932
s458	1
s459	1
s460	0.535087
s461	0.995036
s462	1
s463	1
s464	0.434626
s465	0.864956
s466	1
s467	0.984135
s468	0.427181
s469	0.883309
s470	0.556727
s471	0.28293
s472	0.474583
s473	1
s474	0.525657
s475	0.531456
s476	1
s477	0.528288
s478	0.838382
s479	0.551401
s480	0.471362
s481	0.815079
s482	0.537186
s483	0.412431
s484	0.472259
s485	0.822184
s486	1
s487	0.543315
s488	0.835552
s489	0.36519
s490	0.441652
s491	0.539175
s492	1
s493	1
s494	0.53487
s495	0.964959
s496	0.414848
s497	1
s498	0.544651
s499	0.389432
s500	0.305502
s501	0.529173
s502	0.214832
s503	1
s504	0.880335
s505	0.831074
s506	0.983009
s507	0.861108
s508	0.875947
s509	0.440721
s510	0.882908
s511	1
s512	1
s513	1
s514	0.846335
s515	0.199783
s516	0.845522
s517	0.274537
s518	1
s519	0.260248
s520	1
s521	1
s522	0.469759
s523	0.947924
s524	0.363694
s525	0.548944
s526	0.985279
s527	1
s528	0.956304
s529	1
s530	0.818273
s531	0.398146
s532	0.970792
s533	0.551016
s534	0.805579
s535	0.992239
s536	0.913805
s537	0.982976
s538	0.802388
s539	1
s540	0.487186
s541	1
s542	0.927699
s543	0.549888
s544	0.544477
s545	0.284235
s546	0.856913
s547	1
s548	0.37799
s549	0.128257
s550	0.951938
s551	0.265496
s552	0.810778
s553	0.335384
s554	0.457025
s555	0.419317
s556	0.809233
s557	0.553806
s558	0.933073
s559	0.535321
s560	0.321211
s561	0.558764
s562	1
s563	1
s564	0.369934
s565	0.554414
s566	0.839352
s567	0.5337
s568	0.525307
s569	0.392819
s570	1
s571	0.30832
s572	1
s573	0.841904
s574	0.320414
s575	1
s576	1
s577	0.447094
s578	0.904049
s579	0.812186
s580	1
s581	0.0630656
s582	0.485883
s583	0.435209
s584	0.550681
s585	1
s586	0.84831
s587	0.839973
s588	0.488196
s589	1
s590	1
s591	0.458561
s592	1
s593	1
s594	1
s595	0.214117
s596	0.951638
s597	0.865287
s598	0.916782
s599	0.548974
s600	0.268931
s601	0.161718
s602	1
s603	0.372392
s604	0.820935
s605	0.855304
s606	1
s607	0.544083
s608	1
s609	0.310534
s610	1
s611	0.21552
s612	1
s613	0.537765
s614	0.928702
s615	0.800613
s616	1
s617	0.886018
s618	0.935825
s619	0.402832
s620	0.965561
s621	1
s622	0.489735
s623	0.55737
s624	0.890532
s625	1
s626	0.480929
s627	0.484685
s628	0.544231
s629	1
s630	0.830541
s631	0.28416
s632	0.821038
s633	0.534431
s634	0.83588
s635	0.898085
s636	1
s637	0.888062
s638	0.823655
s639	0.280351
s640	1
s641	0.801181
s642	0.854115
s643	0.147153
s644	1
s645	0.549037
s646	0.530705
s647	1
s648	0.527497
s649	0.296412
s650	0.532241
s651	0.836394
s652	1
s653	0.549802
s654	1
s655	0.819939
s656	0.290132
s657	0.324529
s658	0.357484
s659	0.80492
s660	0.92354
s661	0.532795
s662	0.448828
s663	0.372785
s664	1
s665	0.417807
s666	0.311902
s667	0.915641
s668	0.426928
s669	0.323356
s670	1
s671	0.206682
s672	0.459678
s673	1
s674	0.536848
s675	0.260289
s676	0.45441
s677	0.441707
s678	1
s679	1
s680	0.921763
s681	0.321211
s682	0.833378
s683	0.876922
s684	1
s685	1
s686	0.845947
s687	0.310437
s688	0.463381
s689	0.268423
s690	0.167176
s691	1
s692	0.416064
s693	0.485542
s694	0.329375
s695	0.541248
s696	0.850272
s697	1
s698	0.28768
s699	0.948779
s700	0.136713
s701	0.434255
s702	0.548867
s703	0.159596
s704	0.25678
s705	0.929698
s706	0.969849
s707	0.246953
s708	1
s709	0.867858
s710	1
s711	0.816289
s712	0.447526
s713	0.885766
s714	0.338309
s715	0.48911
s716	1
s717	0.912631
s718	0.913943
s719	1
s720	0.823395
s721	0.366829
s722	0.324589
s723	0.225366
s724	0.534162
s725	0.922983
s726	0.920524
s727	0.27032
s728	1
s729	0.259746
s730	1
s731	0.307423
s732	0.304736
s733	0.376022
s734	0.821145
s735	0.38965
s736	0.887341
s737	0.913429
s738	0.974349
s739	0.532214
s740	0.887726
s741	0.376262
s742	1
s743	0.923125
s744	0.531883
s745	0.814649
s746	0.834259
s747	1
s748	1
s749	0.324529
s750	1
s751	0.551096
s752	0.82105
s753	0.243043
s754	0.550036
s755	1
s756	0.807395
s757	0.0934169
s758	1
s759	0.999099
s760	0.882135
s761	1
s762	0.911187
s763	1
s764	0.931864
s765	0.87852
s766	1
s767	0.900384
s768	0.401047
s769	0.123901
s770	1
s771	1
s772	0.351378
s773	0.832268
s774	1
s775	0.175185
s776	0.214806
s777	0.552706
s778	0.809119
s779	0.946384
s780	0.225182
s781	0.545886
s782	0.366751
s783	0.835527
s784	0.546595
s785	0.312218
s786	0.938407
s787	0.819329
s788	0.810763
s789	0.545366
s790	0.881081
s791	0.976324
s792	0.187443
s793	0.844834
s794	1
s795	0.872499
s796	0.805225
s797	0.201137
s798	0.902794
s799	0.438475
s800	0.819299
s801	0.908273
s802	1
s803	0.529058
s804	1
s805	1
s806	0.553146
s807	1
s808	1
s809	1
s810	0.470829
s811	1
s812	0.241999
s813	0.214117
s814	0.402546
s815	1
s816	1
s817	1
s818	0.929517
s819	1
s820	1
s821	1
s822	0.81889
s823	0.540072
s824	0.0675424
s825	0.32814
s826	0.229524
s827	0.916745
s828	0.860864
s829	1
s830	0.956285
s831	0.547383
s832	0.899604
s833	0.244734
s834	0.489595
s835	1
s836	0.449308
s837	0.173087
s838	0.867259
s839	0.803882
s840	0.966578
s841	0.878268
s842	0.283715
s843	0.990467
s844	0.874822
s845	0.999529
s846	0.55617
s847	0.442859
s848	0.07214
s849	0.366965
s850	0.149564
s851	0.918598
s852	0.309087
s853	0.411574
s854	1
s855	0.237592
s856	0.859937
s857	0.921799
s858	1
s859	0.356067
s860	0.95496
s861	0.938353
s862	0.400641
s863	0.983804
s864	0.535603
s865	0.951667
s866	0.421778
s867	0.360762
s868	0.543591
s869	0.815998
s870	1
s871	1
s872	0.440069
s873	0.225019
s874	0.318389
s875	0.825301
s876	0.854909
s877	0.923134
s878	0.325763
s879	0.373194
s880	0.843739
s881	0.369155
s882	0.892905
s883	0.433515
s884	0.427009
s885	0.413464
s886	0.542387
s887	0.382812
s888	1
s889	0.488784
s890	0.352928
s891	0.393631
s892	1
s893	1
s894	0.207013
s895	0.89095
s896	0.319981
s897	0.388694
s898	0.891096
s899	0.258207
s900	0.877273
s901	1
s902	0.999084
s903	0.487711
s904	0.417413
s905	0.140555
s906	1
s907	0.380469
s908	1
s909	0.803533
s910	1
s911	1
s912	0.468655
s913	0.149973
s914	0.222428
s915	0.441951
s916	0.826721
s917	0.831774
s918	1
s919	0.454892
s920	0.259116
s921	0.873873
s922	1
s923	0.914543
s924	0.395761
s925	0.552858
s926	0.283616
s927	1
s928	0.256448
s929	1
s930	1
s931	1
s932	1
s933	1
s934	1
s935	0.800863
s936	0.814917
s937	0.82533
s938	1
s939	1
s940	0.419724
s941	1
s942	0.96774
s943	0.976554
s944	0.280408
s945	0.25493
s946	0.860596
s947	0.82554
s948	0.898099
s949	0.145618
s950	0.974363
s951	0.992846
s952	1
s953	1
s954	0.467166
s955	1
s956	0.15951
s957	0.826697
s958	0.550877
s959	0.823422
s960	0.339699
s961	1
s962	0.364047
s963	1
s964	0.18474
s965	0.873967
s966	0.471633
s967	0.834935
s968	0.416908
s969	0.53963
s970	0.282643
s971	0.815691
s972	0.834792
s973	0.999757
s974	0.25681
s975	0
s976	1
s977	0.2264
s978	0.538773
s979	0.322621
s980	0.457462
s981	0.95545
s982	0.133452
s983	0.996499
s984	1
s985	0.907597
s986	0.542177
s987	0.841626
s988	0.533021
s989	1
s990	0.983815
s991	0.287568
s992	1
s993	1
s994	1
s995	0.375512
s996	0.271517
s997	0.82266
s998	0.874984
s999	0.444638
s1000	0.558556
